# Supplementary material for: Hepatitis B virus spliced variants are associated with an impaired response to interferon therapy
Source: PubMed Central journal article supplement (PMC4653653; doi:10.1038/srep16459), 2015-11-20
Supplement: srep16459-s1.pdf [file srep16459-s1.pdf]

# Supplementary Materials

## **Hepatitis B virus spliced variants are associated with an impaired response to interferon therapy**

Jieliang Chen<sup>1</sup>, Min Wu<sup>3</sup>, Fan Wang<sup>3</sup>, Wen Zhang<sup>1</sup>, Wei Wang<sup>3</sup>, Xiaonan Zhang<sup>3</sup>, Jiming Zhang<sup>4</sup>, Yinghui Liu<sup>1</sup>, Yi Liu<sup>3</sup>, Yanling Feng<sup>3</sup>, Ye Zheng<sup>3</sup>, Yunwen Hu<sup>3</sup>, Zhenghong Yuan<sup>1,2</sup>

1. *Key Laboratory of Medical Molecular Virology, School of Basic Medical Sciences, Shanghai Medical College of Fudan University, China*
2. *Institutes of Medical Microbiology and Biomedical Sciences, Fudan University, Shanghai, China*
3. *Shanghai Public Health Clinical Center, Shanghai Medical College of Fudan University, China*
4. *Huashan Hospital affiliated to Fudan University, China*

### **Correspondence**

Prof. Zhenghong Yuan, MD, PhD

E-mail: [zhyuan@shaphc.org](mailto:zhyuan@shaphc.org)

Add: Rm 1115, Zhidao Bldg, 138 YiXueYuan Rd, Shanghai 200032, China

Tel: +86-21-54237669

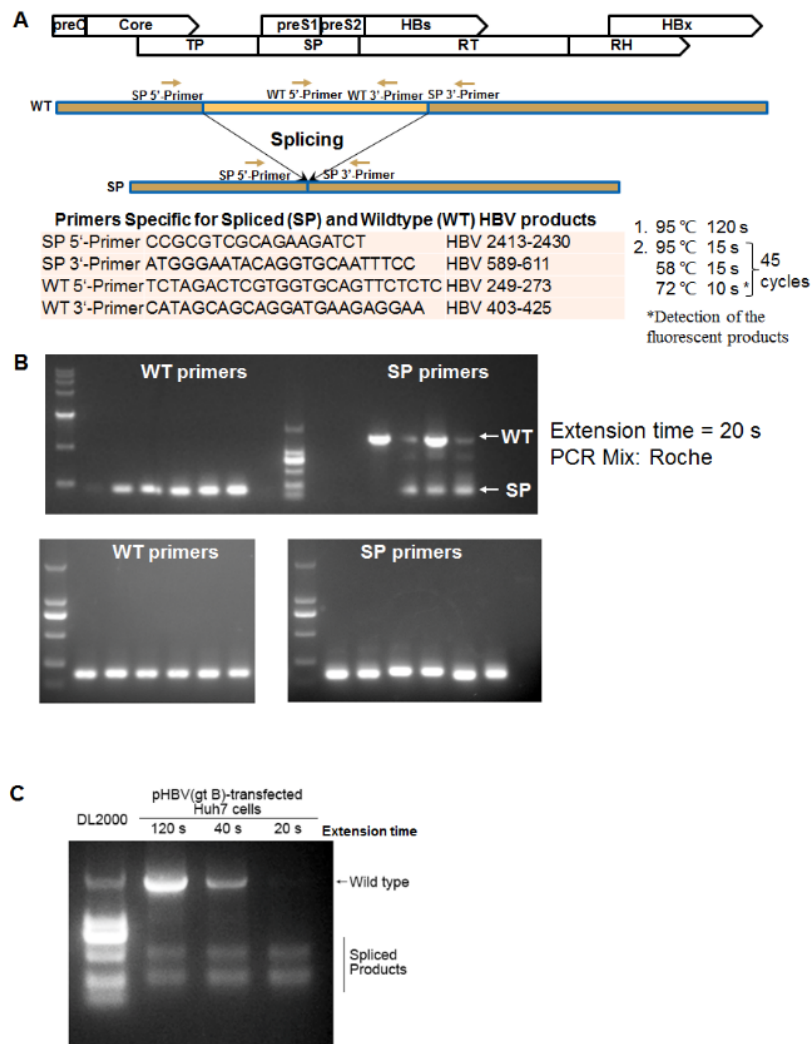

**Fig S1. Optimization of the PCR protocol for WT and SP HBV DNAs amplification.**

(A) Schematic of the designed primers for detecting WT- and SP-HBV DNAs. (B) The HBV DNAs extracted from the sera of CHB patients were analyzed by PCR followed by agarose gel electrophoresis with primers specific for WT or SP. The extension time during PCR was 20 s (the upper panel) or 10 s (the lower panel). The data showed that protocol setting extension time as 10 s was suitable for amplify specific WT- and SP- HBV DNAs, during which there was no nonspecific amplification of WT products with SP primers. (C) The cDNAs reverse-transcribed from the total RNAs extracted from Huh7 cells transfected with pHBV1.3 were analyzed by PCR followed by agarose gel electrophoresis. The data showed that the shorter extension time led to less amplified products of wtHBV (~2 kb) but did not much affect the amounts of the amplified products of spHBV(~0.3-0.5 kb), which may be a result of the characteristic of the polymerase (1 kb/min) used in PCR.

**A** TP -fEcoRI GCGGAATTCATGCCCCCTATCTTATCAACA  
 TP -rXhoI GAACTCGAGCTACTCGTGTCCCAAGAATATG  
 SP -fBamHI ATTGGATCCCTACAGCATGGGAGGTTGGTC  
 SP -rXhoI GCGCTCGAGCTATTCGAGAAGATTGACGATAT

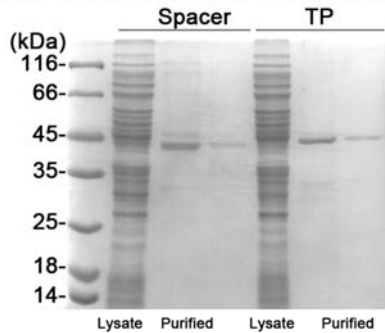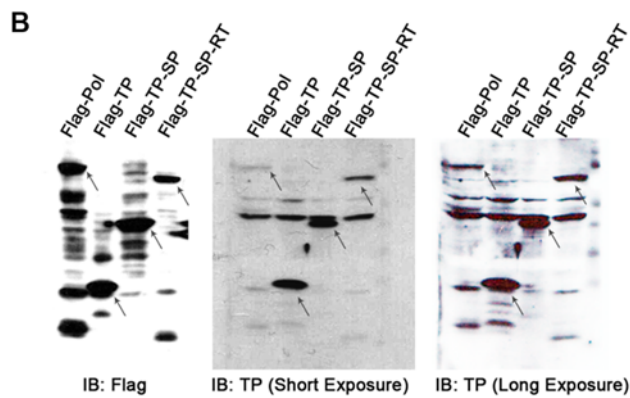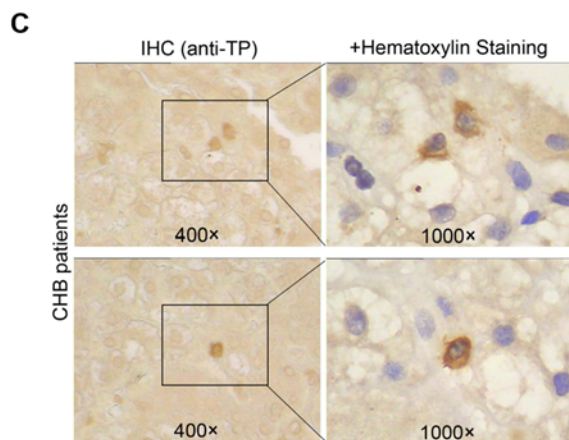

**Fig S2. Preparation of the antibodies against TP and Spacer regions of viral polymerase.** (A) Detection of the purified GST-Spacer and GST-TP proteins expressed in the E. coli BL21 by SDS-PAGE followed by coomassie staining. (B) Huh7 cells transfected with the indicated plasmids were extracted to detect the expression of full length- and truncated-Pol by western blotting with anti-Flag Abs or anti-TP Abs. (C) Detection of HBV proteins expression in liver biopsies from CHB patients by immunohistochemistry with anti-TP antibodies.

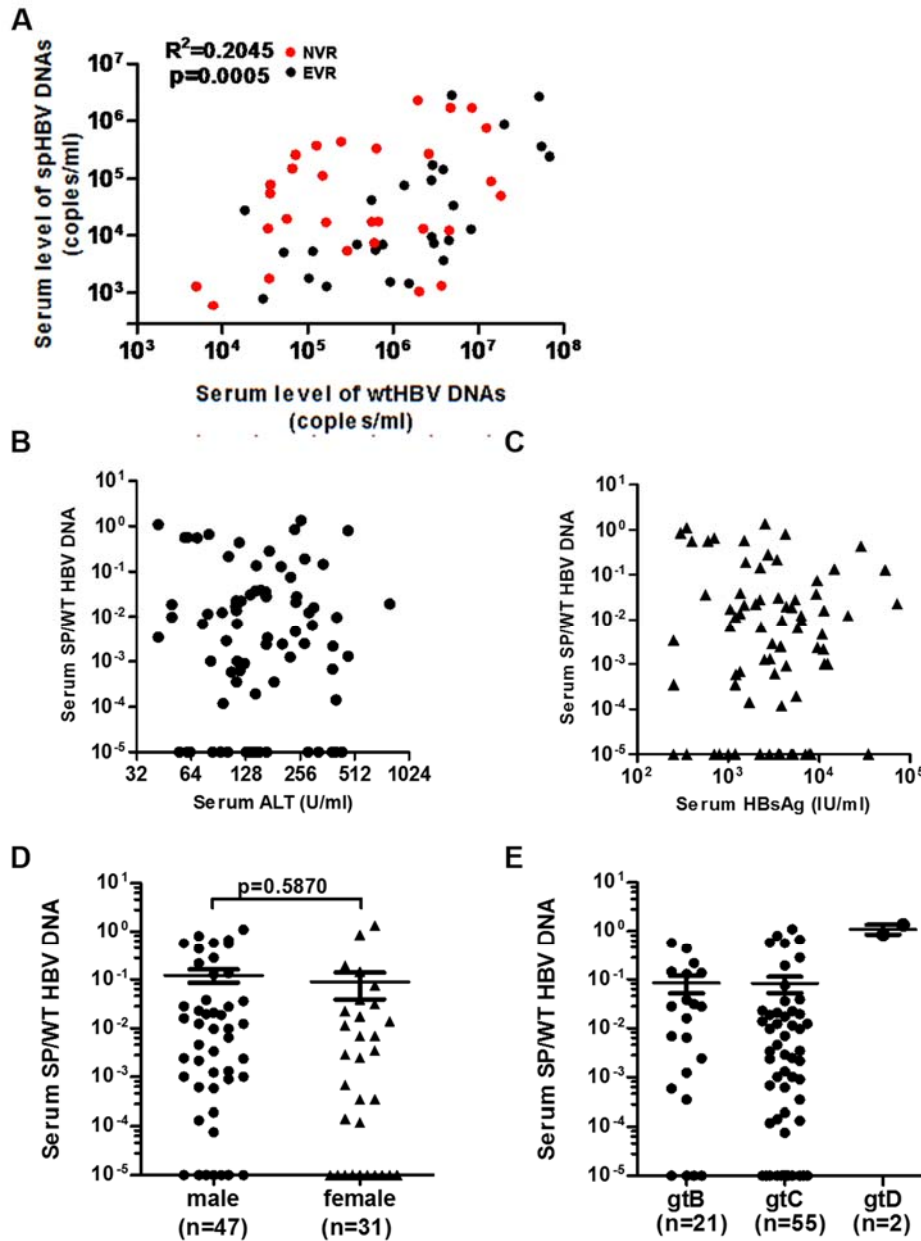

**Fig S3. The correlation between spHBV variants and HBsAg, ALTs, genders or viral genotypes.** (A) The level of spHBV and wtHBV DNAs in sera from the NVRs and EVRs before IFN therapy were quantified by qPCR. The relationship between spHBV DNAs and wtHBV DNAs in samples with spHBV > 100 copies/ml was analyzed using Spearman's correlation. The correlation between the proportions of spHBV and the level of ALT (B) or HBsAg (C) in the sera from the 82 patients before IFN therapy. The ratio of spHBV to wtHBV DNAs in the serum samples was compared between males and females (D) (Student's t-tests) or among different genotypes (E).

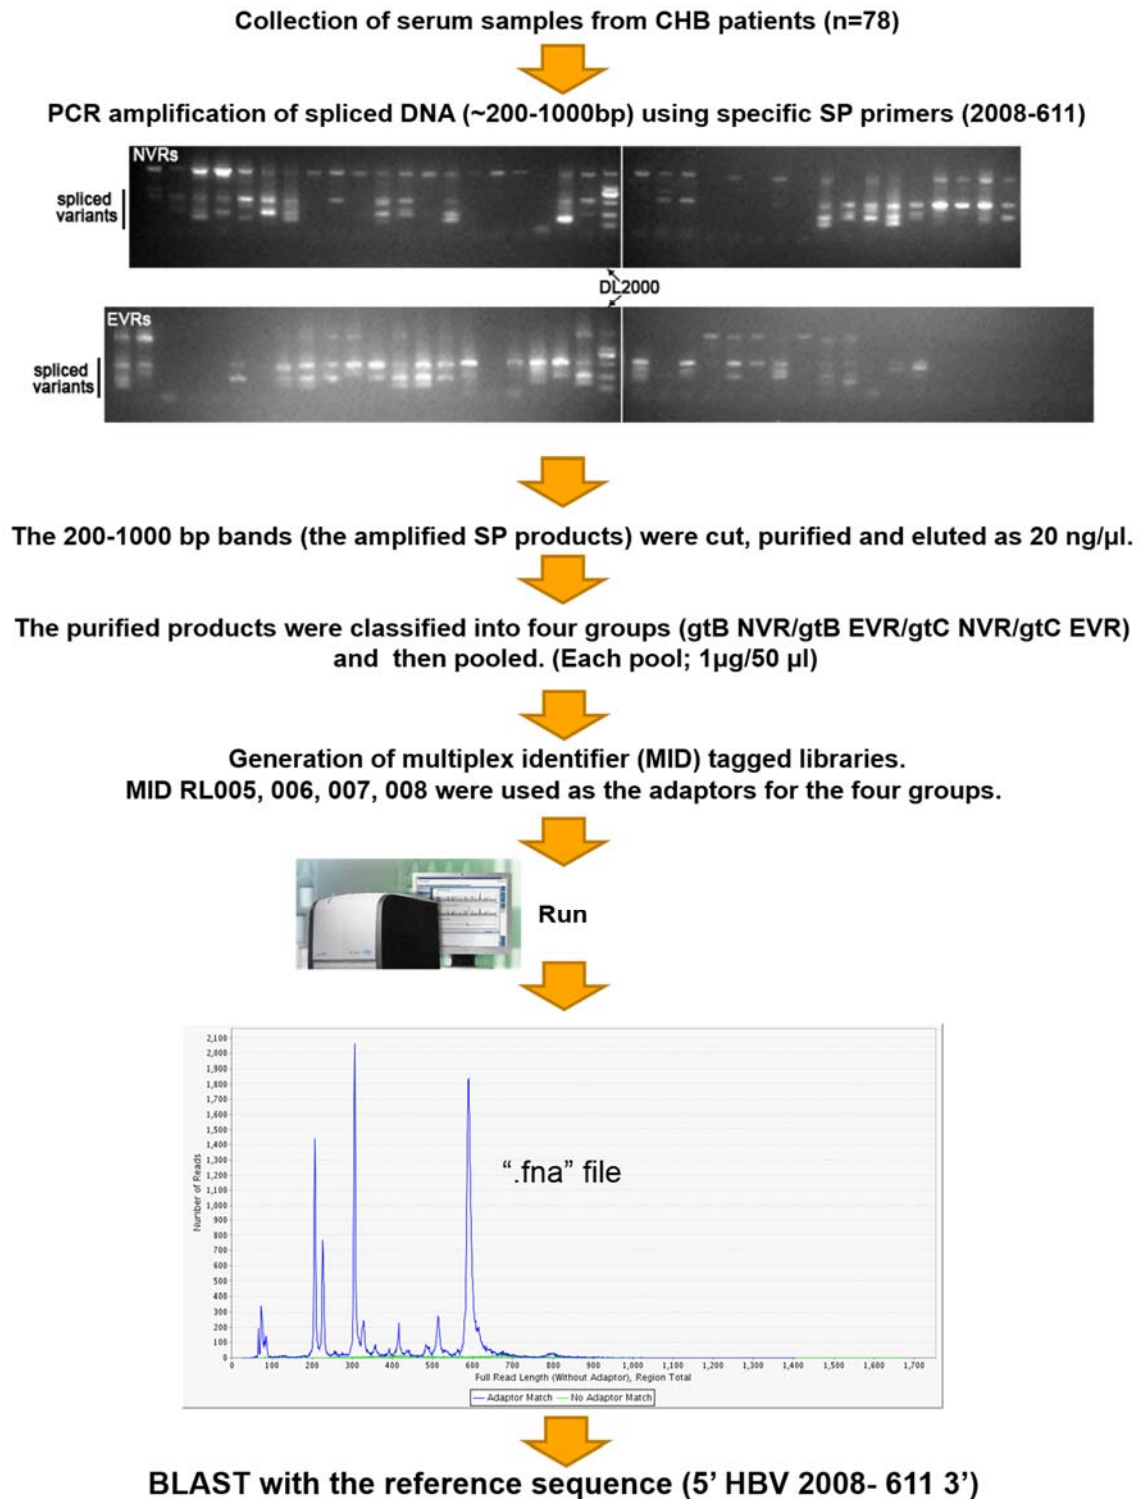

**Fig S4. Work Flow of the 454 sequencing analysis of the spHBV variants in the sera of CHB patients.**

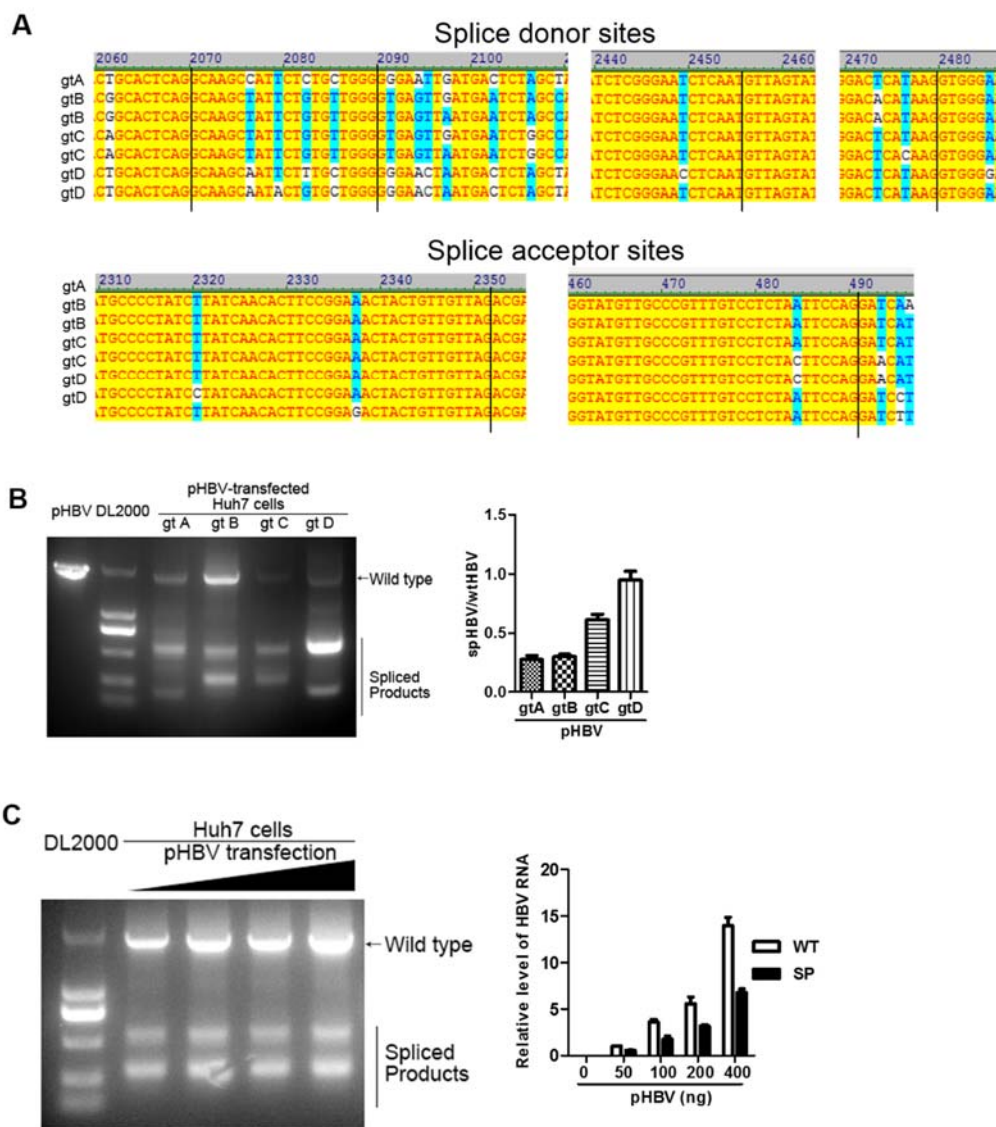

**Fig S5. HBV splicing is associated with the viral genotypes.** (A) The sequence alignment of the donor and acceptor sites among different HBV genotypes. (B) The cDNAs reverse-transcribed from the total RNAs extracted from Huh7 cells transfected with HBV constructs with different genotypes were analyzed by PCR followed by agarose gel electrophoresis (the left panel) and realtime PCR (the right panel). (C) The cDNAs reverse-transcribed from the total RNAs extracted from Huh7 cells transfected with different amounts of pHBV1.3 were analyzed by PCR followed by agarose gel electrophoresis (the left panel) and realtime PCR (the right panel). The data showed that the intracellular level of both the wt- and sp-HBV RNAs closely associated with the amounts of transfected plasmids, but there was no significant difference on the ratio of spHBV to wtHBV RNAs among cells transfected with different amounts of pHBV1.3.

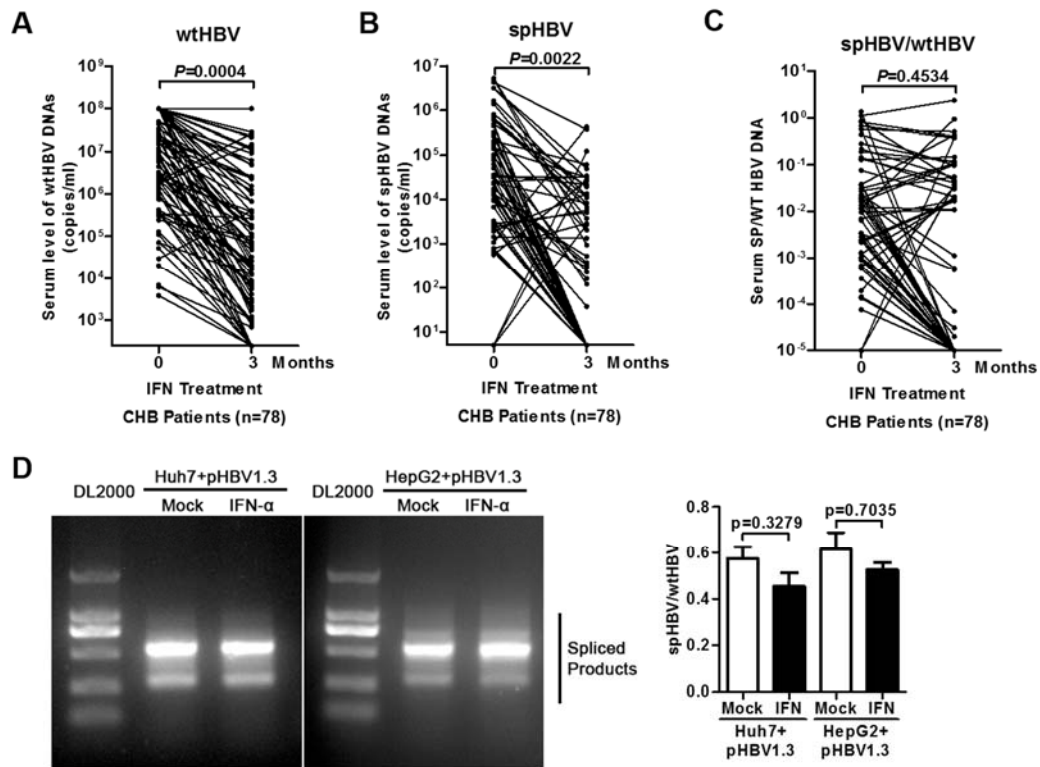

**Fig S6. Effect of IFN treatment on the expression of the spHBV variants.** Comparison of the absolute amount of wtHBV(A), spHBV(B), and the ratios of spHBV/wtHBV(C) DNA between paired samples from CHB patients before and after 3 months of IFN therapy. The cDNAs reverse-transcribed from the total RNAs extracted from mock- or IFN- $\alpha$  treated Huh7 or HepG2 cells transfected with pHBV1.3 were analyzed by PCR followed by agarose gel electrophoresis (the upper panel) and realtime PCR (the lower panel). The data, which represents results of three independent experiments performed in triplicates, was analyzed using Student's t-tests (D). To determine whether IFN treatment could affect HBV splicing, we compared the change of the amounts of spHBV and wtHBV in CHB patients following IFN therapy. Twelve weeks of IFN therapy resulted in varying degrees of reduction of both spHBV DNA level and wtHBV DNA level, and decreased the total detection rate of the serum spHBV, particularly in EVRs. Although the absolute amounts of spHBV and wtHBV decreased, the spHBV/wtHBV ratio was not much affected by IFN treatments, in both the NVRs and EVRs group. Similar results were obtained in replication-competent HBV constructs-transfected Huh7 and HepG2 cells, suggesting that IFN could globally reduce the viral DNA, including the spHBV DNA and wtHBV DNA, but did not much affect the proportions of spHBV variants among the total detected HBV genomes.

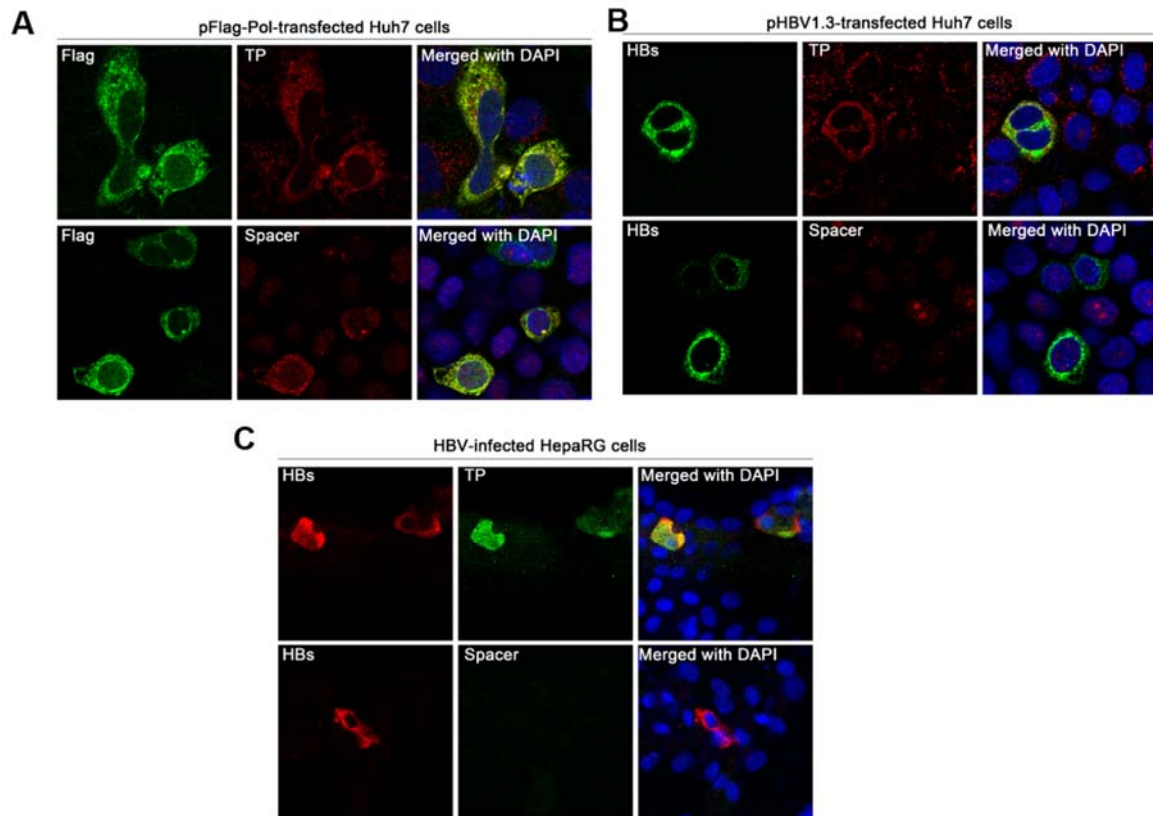

**Fig S7. Detection of viral proteins expression using immunofluorescence with anti-TP and anti-SP antibodies.** (A, B) Huh7 cells transfected with pFlag-Pol or pHBV1.3 were fixed, immunofluorescence stained with indicated antibodies, and analyzed using a confocal laser scanning microscope. (C) Ten days post HBV infection of the HepaRG cells, immunofluorescence assay was performed with indicated antibodies.



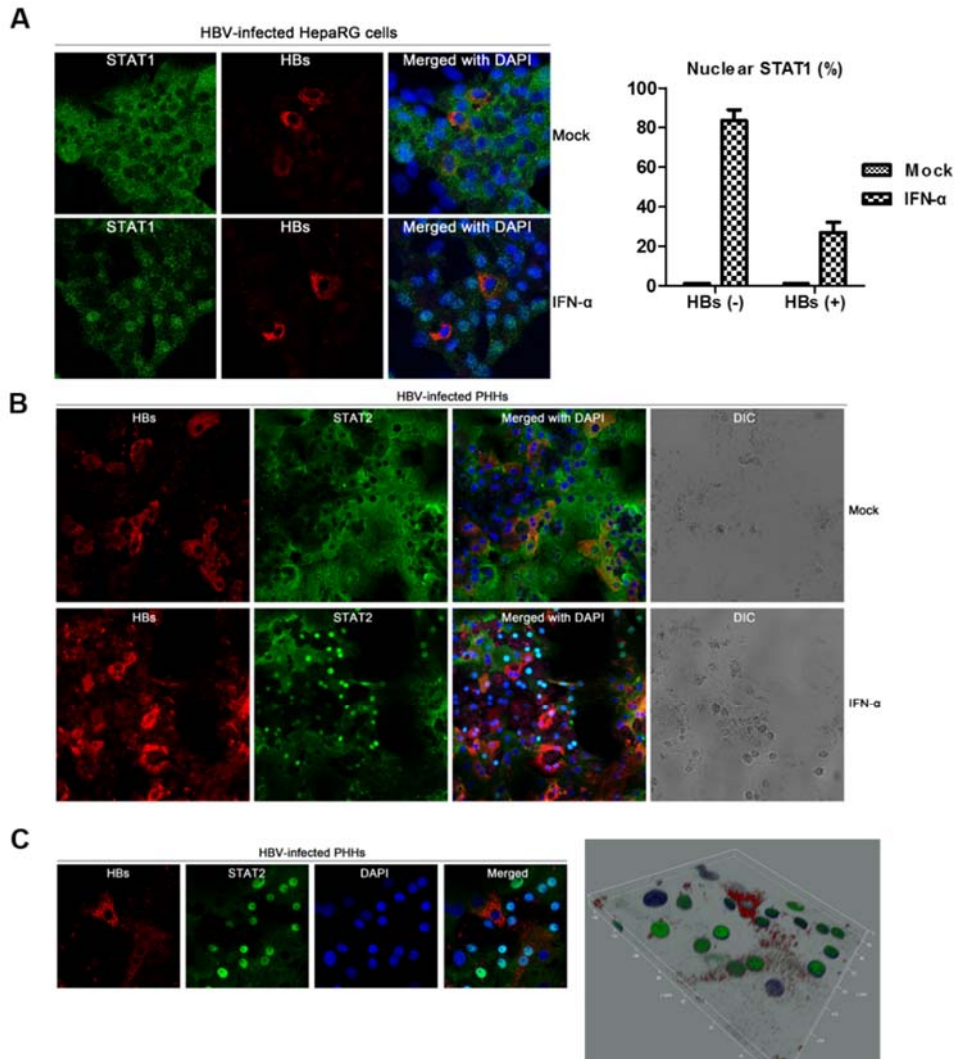

**Fig S8. Impaired IFN-induced STAT1/2 nuclear accumulation in HepaRG cells and HBV-infected PHHs.** (A) HepaRG cells plated in the chamber coverglass slides were treated with pooled sera from CHB patients overnight. 10 days post HBV infection, the cells were mock-treated or treated with IFN- $\alpha$  for 0.5 h, followed by the immunofluorescence assay with antibodies against HBs and STAT1 (the left panel). The percentage of cells with nuclear STAT1 from three independent fields covering approximately 100 HBs negative and 30 HBs positive cells was calculated (mean $\pm$ SD) (the right panel). The experiments were performed three independent times in triplicates. (B) PHH cells were plated in the collagen I-pre-coated chamber coverglass slides. 10 days post HBV infection, the cells were treated with or without IFN- $\alpha$  for 0.5 hours, followed by the immunofluorescence assay with antibodies against HBs and STAT2. (C) The PHH cells with HBV viral protein expression showed an impaired STAT2 nuclear-translocation upon IFN treatment compared to those cells without HBV. The three-dimensional view of one of the representative field of IFN-treated PHHs were obtained by reconstruction of z-series sectioned fluorescent images using Leica Confocal Software.

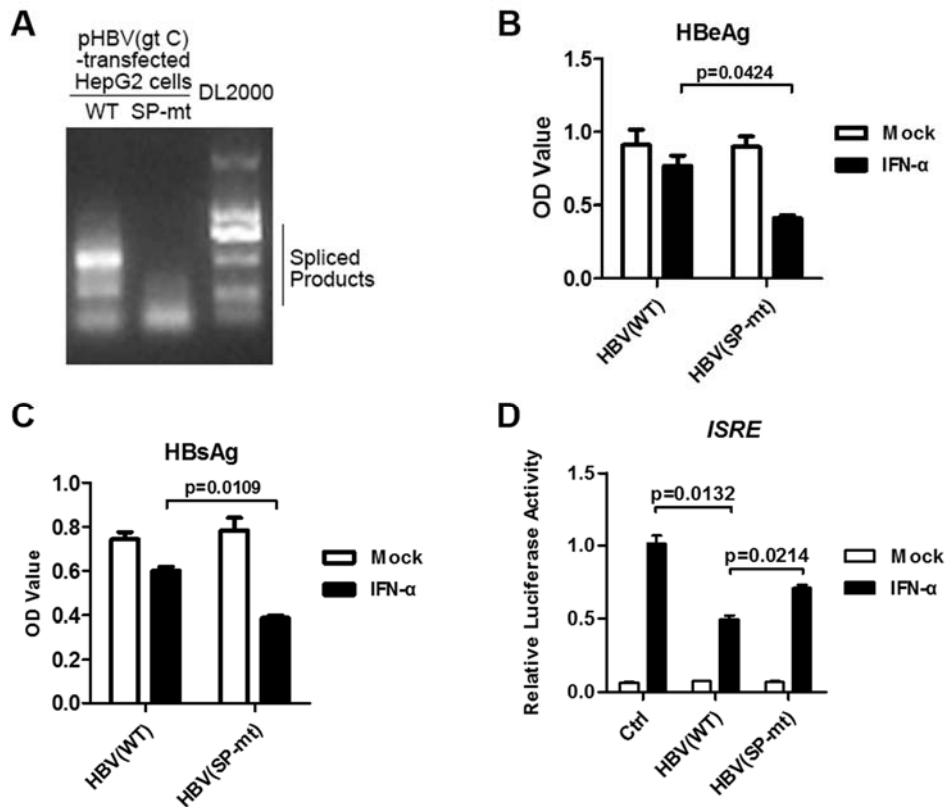

**Fig S9. Mutation of the common splice sites of HBV impaired its anti-IFN activities in HepG2 cells.**

The cDNAs reverse-transcribed from the total RNAs extracted from pHBV1.3- or pHBV1.3-SP-mt-transfected HepG2 cells were analyzed by PCR followed by agarose gel electrophoresis (A). The level of HBeAg and HBsAg in culture supernatants 48 h post transfection was analyzed by ELISA (B, C). HepG2 cells transfected with the indicated plasmids were mock- or IFN- $\alpha$ -treated for 12 hours and then harvested for luciferase reporter assay (D). The data was analyzed using Student's t-tests.

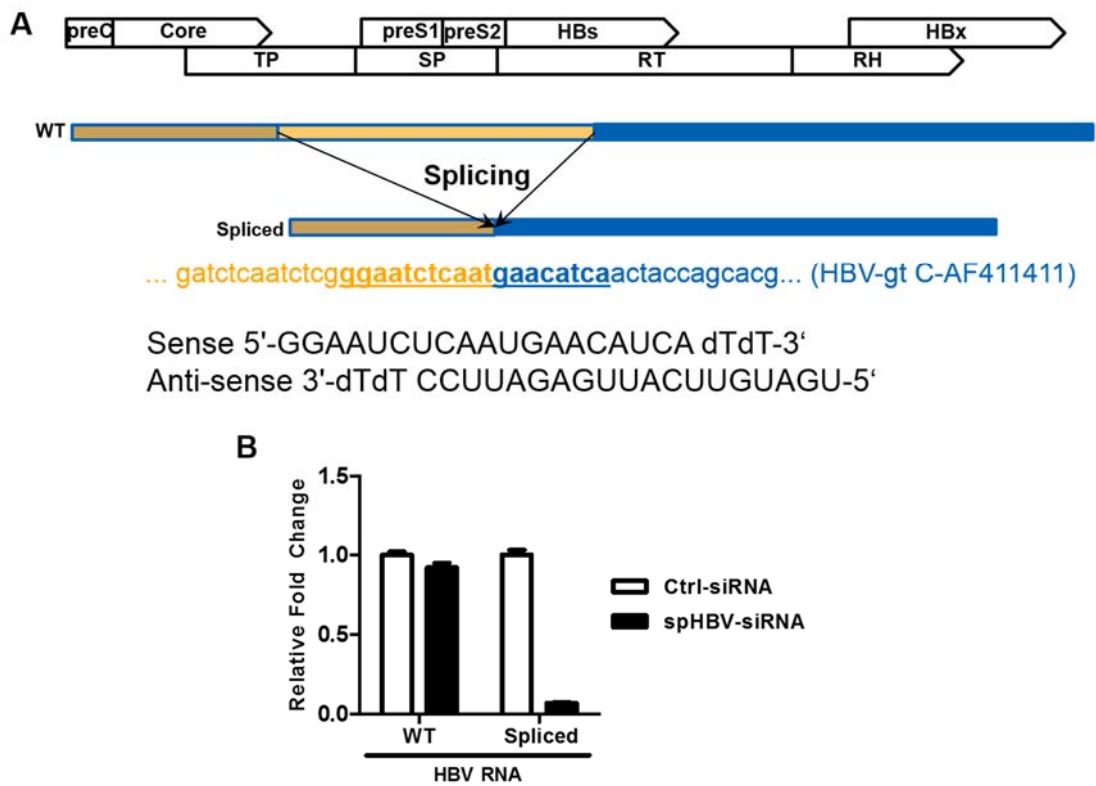

**Fig S10. siRNA specifically targeting the major spHBV RNAs**

(A) Schematic of the designed siRNA that specifically targets the major spliced HBV RNAs. (B) Huh7 cells were co-transfected with pHBV and control siRNAs or siRNAs targeting spHBV RNAs. 48 h post transfection, the RNAs were extracted for real-time PCR using indicated primers to determine the level of wildtype and spliced HBV RNAs.

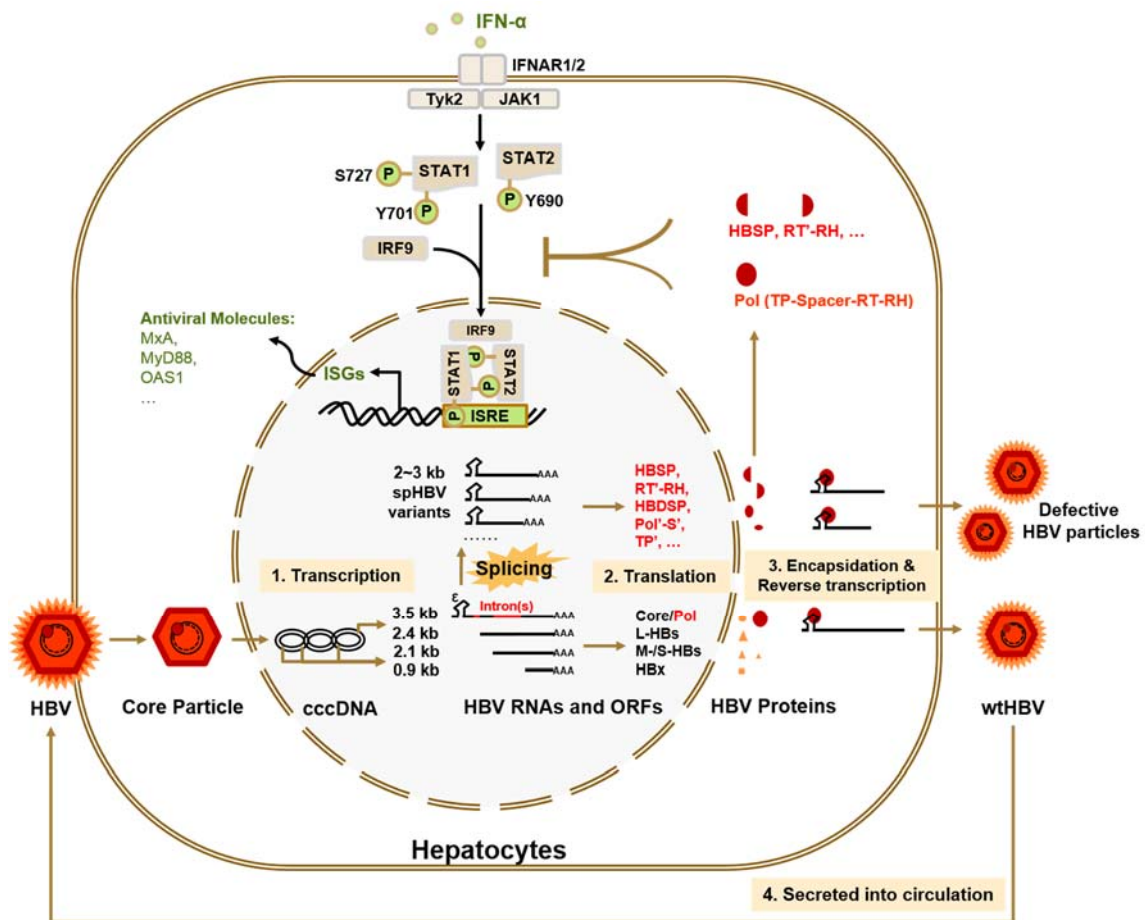

**Fig S11. Model of HBV splicing-generated products-mediated inhibition on IFN signaling.**

**Table S1. Species and frequency of HBV spliced variants detected in the sera from CHB patients.**

| Types of HBV spliced variants | Exon Counts | 3' splice acceptor sites      | 5' splice donor sites           | Frequencies of HBV spliced variants (%) |       |       |       |
|-------------------------------|-------------|-------------------------------|---------------------------------|-----------------------------------------|-------|-------|-------|
|                               |             |                               |                                 | NVRs                                    |       | EVRs  |       |
|                               |             |                               |                                 | gtB                                     | gtC   | gtB   | gtC   |
| SP1                           | 2           | 488/489                       | 2447/2448                       | 43.59                                   | 48.60 | 40.96 | 40.25 |
| SP2                           | 3           | 2349/2350, 488/489            | 2067/2068, 2447/2448            | 17.18                                   | 17.62 | 23.13 | 23.70 |
| SP3                           | 2           | 488/489                       | 2067/2068                       | 9.95                                    | 7.61  | 9.79  | 9.90  |
| SP4                           | 3           | 2349/2350, 488/489            | 2087/2088, 2447/2448            | 7.99                                    | 7.52  | 7.69  | 7.15  |
| SP5                           | 2           | 488/489                       | 2087/2088                       | 9.84                                    | 5.42  | 5.66  | 4.68  |
| SP6                           | 2           | 488/489                       | 2471/2472                       | 0.42                                    | 0.26  | 0.11  | 0.25  |
| SP7                           | 3           | 2936/2937, 488/489            | 2447/2448, 3020/3021            | 0.03                                    | 0.02  | 0.01  | 0.02  |
| SP8                           | 4           | 2349/2350, 2936/2937, 488/489 | 2067/2068, 2447/2448, 3020/3021 | 6.13                                    | 6.51  | 7.30  | 7.73  |
| SP9                           | 2           | 281/282                       | 2447/2448                       | 0.00                                    | 0.00  | 0.00  | 0.00  |
| SP10                          | 3           | 2349/2350, 281/282            | 2067/2068, 2447/2448            | 0.72                                    | 0.92  | 0.80  | 0.46  |
| SP11                          | 2           | 281/282                       | 2471/2472                       | 0.00                                    | 0.00  | 0.00  | 0.00  |
| SP12                          | 3           | 2235/2236, 281/282            | 2067/2068, 2447/2448            | 0.02                                    | 0.05  | 0.02  | 0.03  |
| SP13                          | 2           | 488/489                       | 3020/3021                       | 0.00                                    | 0.00  | 0.00  | 0.00  |
| SP14                          | 2           | 2936/2937                     | 2447/2448                       | 0.00                                    | 0.00  | 0.00  | 0.00  |
| SP15*                         | 3           | 2235/2236, 488/489            | 2067/2068, 2447/2448            | 1.28                                    | 1.07  | 1.19  | 1.39  |
| SP16*                         | 3           | 2349/2350, 488/489            | 2067/2068, 2471/2472            | 1.38                                    | 2.61  | 2.01  | 3.19  |
| SP17*                         | 2           | 281/282                       | 2067/2068                       | 1.47                                    | 1.80  | 1.33  | 1.25  |



| <b>0 week</b>   | <b>SP detection rate (positive/total)</b> | <b>AVG of SP/WT</b> | <b>Two-tailed t-test</b> |
|-----------------|-------------------------------------------|---------------------|--------------------------|
| NVRs (<2 log)   | 31/37                                     | 0.203832576         | p=0.00215                |
| EVRs (>2 log)   | 29/41                                     | 0.024805674         |                          |
|                 |                                           |                     |                          |
| <b>12 weeks</b> | <b>SP detection rate (positive/total)</b> | <b>AVG of SP/WT</b> |                          |
| NVRs (<2 log)   | 26/37                                     | 0.159418305         | p=0.03611                |
| EVRs (>2 log)   | 11/41                                     | 0.018208319         |                          |

\* Before IFN treatment; \*\* After 12 weeks of IFN treatment;

“SP-positive” was defined as spHBV positive and spHBV/wtHBV >0.00001;  
The viral load was determined using an HBV DNA quantitative real-time PCR kit (Qiagen) and  
HBV genotyping was performed as previously reported (1).

Table S3. Regression analysis of the factors related to the prognosis of IFN responses

| HBs (U/ml) | SP/WT DNA   | *Fold Reduction | Gender | Age | ALT(IU/ml) | HBs(Log)    | SP/WT DNA (Log) | Fold Reduction (Log) |
|------------|-------------|-----------------|--------|-----|------------|-------------|-----------------|----------------------|
| 4900       | 0.00001     | 9.788135593     | 2      | 40  | 55         | 3.69019608  | -5              | 0.990699977          |
| 1350       | 0.038938355 | 12.32           | 2      | 28  | 155        | 3.130333768 | -1.409622394    | 1.090610708          |
| 5450       | 0.027930749 | 21.67741935     | 1      | 21  | 166        | 3.736396502 | -1.553917418    | 1.336007579          |
| 5000       | 0.018689008 | 7.662337662     | 1      | 32  | 50         | 3.698970004 | -1.728413739    | 0.884361286          |
| 2850       | 0.00001     | 10.02008032     | 1      | 38  | 141        | 3.45484486  | -5              | 1.000871203          |
| 20802      | 0.012340135 | 5.334796926     | 1      | 36  | 95         | 4.318105092 | -1.908680077    | 0.727117892          |
| 9230       | 0.037873477 | 16.26139818     | 1      | 29  | 145        | 3.965201701 | -1.421664827    | 1.211157884          |
| 700        | 0.667265235 | 93.47368421     | 1      | 26  | 80         | 2.84509804  | -0.175701502    | 1.97068936           |
| 3550       | 0.031206732 | 7.692307692     | 2      | 28  | 136        | 3.550228353 | -1.505751708    | 0.886056648          |
| 1000       | 0.00001     | 10.88737201     | 1      | 30  | 93         | 3           | -5              | 1.036923063          |
| 4250       | 0.803573363 | 5.829015544     | 1      | 28  | 472        | 3.62838893  | -0.094974468    | 0.765595213          |
| 1550       | 0.192109425 | 16.10062893     | 2      | 27  | 272        | 3.190331698 | -0.716451328    | 1.206842841          |
| 1050       | 0.006963361 | 43.78531073     | 2      | 24  | 115        | 3.021189299 | -2.157181059    | 1.641328436          |
| 2250       | 0.144987527 | 0.119863014     | 2      | 29  | 343        | 3.352182518 | -0.838669357    | -0.921314807         |
| 2750       | 0.282632277 | 0.07556391      | 1      | 25  | 173        | 3.439332694 | -0.548778242    | -1.121685579         |
| 2550       | 1.350975885 | 42.24021592     | 2      | 39  | 259        | 3.40654018  | 0.130647597     | 1.62572613           |
| 250        | 0.00001     | 10.1076716      | 1      | 38  | 63         | 2.397940009 | -5              | 1.004651123          |
| 2250       | 0.00001     | 16.09195402     | 2      | 37  | 61         | 3.352182518 | -5              | 1.206608783          |
| 9500       | 0.07576458  | 17.34693878     | 2      | 21  | 227        | 3.977723605 | -1.120533777    | 1.239222846          |
| 1200       | 0.011509732 | 5.442073171     | 2      | 28  | 79         | 3.079181246 | -1.938934772    | 0.735764377          |
| 53122      | 0.129049604 | 2.565720294     | 1      | 46  | 201        | 4.725274418 | -0.889243324    | 0.409209309          |
| 250        | 0.00001     | 1.279850746     | 2      | 28  | 152        | 2.397940009 | -5              | 0.107159326          |
| 1500       | 7.57706E-05 | 19.51456311     | 1      | 36  | 102        | 3.568201724 | -3.87756753     | 1.290358833          |
| 3700       | 0.00001     | 65.77981651     | 2      | 28  | 239        | 2.477121255 | -0.06773129     | 1.818092658          |
| 1150       | 0.00001     | 5.844262295     | 1      | 28  | 69         | 2.602059991 | -0.252163033    | 0.766729699          |
| 300        | 0.855595931 | 0.072413793     | 1      | 22  | 42         | 2.544068044 | 0.042144016     | -1.140178703         |
| 400        | 0.559547509 | 8.942028986     | 1      | 36  | 61         | 3.176091259 | -0.241726361    | 0.951436073          |
| 350        | 1.10190465  | 6.134453782     | 1      | 38  | 145        | 3.748188027 | -3.71350616     | 0.787775899          |
| 1500       | 0.573157051 | 44.05286344     | 1      | 29  | 147        | 4.167317335 | -0.868872759    | 1.643974143          |
| 5600       | 0.000193417 | 9.009009009     | 1      | 39  | 166        | 3.980094314 | -2.621970987    | 0.954677021          |
| 15150      | 0.000132566 | 20.66115702     | 1      | 28  | 389        | 4.047274867 | -2.662610105    | 1.315154638          |
| 14700      | 0.135246876 | 4.651162791     | 1      | 22  | 118        | 4.460145817 | -0.356119229    | 0.66756154           |
| 9552       | 0.002387971 | 4.385964912     | 1      | 27  | 50         | 3.802773725 | -2.007267791    | 0.642065153          |
| 11150      | 0.002174653 | 8.130081301     | 1      | 32  | 241        | 4.033423755 | -2.334787654    | 0.910094889          |
| 28850      | 0.440433932 | 3.546099291     | 1      | 26  | 115        | 4.093421685 | -2.994044286    | 0.549750892          |
| 6350       | 0.009834045 | 1               | 1      | 28  | 114        | 4.859024152 | -1.642218892    | 0                    |
| 10800      | 0.004626072 | 4.587155963     | 1      | 26  | 82         | 4.058805487 | -2.99223795     | 0.661543506          |
| 12400      | 0.001013808 | 148.3679525     | 1      | 24  | 305        | 4.054995862 | -1.79343629     | 2.171340103          |
| 72281      | 0.02279193  | 100             | 2      | 55  | 403        | 3.550228353 | -5              | 2                    |
| 11450      | 0.001018033 | 338.6138614     | 2      | 18  | 385        | 3.717004407 | -5              | 2.529704732          |
| 11350      | 0.016090284 | 118.1440443     | 1      | 40  | 165        | 2.748962861 | -1.442636355    | 2.072411834          |
| 3550       | 0.00001     | 108.8235294     | 2      | 28  | 152        | 3.887898488 | -5              | 2.036722807          |
| 5212       | 0.00001     | 232.5396825     | 2      | 32  | 184        | 2.397940009 | -3.452613076    | 2.366497075          |
| 561        | 0.036088069 | 184.3478261     | 1      | 27  | 169        | 2.397940009 | -2.474566454    | 2.265638021          |
| 7725       | 0.00001     | 148.9130435     | 2      | 34  | 42         | 2.397940009 | -2.461923824    | 2.17293274           |
| 250        | 0.000352685 | 103200          | 1      | 39  | 300        | 3.763427994 | -2.19089742     | 5.013679697          |
| 250        | 0.003353    | 18083.18264     | 2      | 33  | 387        | 3.130333768 | -3.166484492    | 4.257274869          |
| 250        | 0.003452043 | 4508.928571     | 2      | 22  | 121        | 3.301029996 | -1.649043083    | 3.654073355          |
| 5800       | 0.006443214 | 81300.81301     | 1      | 32  | 107        | 3.084933575 | -3.231456325    | 4.910094889          |
| 1350       | 0.000681578 | 21625.61576     | 2      | 31  | 129        | 4.541579244 | -5              | 4.334968482          |
| 2000       | 0.022436593 | 4309.52381      | 1      | 25  | 103        | 3.537819095 | -0.661663917    | 3.634429284          |
| 1216       | 0.000586872 | 3095.975232     | 1      | 30  | 408        | 3.591064607 | -2.013589393    | 3.490797478          |

Regression Analysis

**OVERALL FIT**

Multiple R 0.3421102  
 R Square 0.1170394  
 Adjusted R Squ 0.0557227  
 Standard Errc 1.2941637  
 Observations: 78

| ANOVA      |    | Alpha 0.05 |           |           |           |     |
|------------|----|------------|-----------|-----------|-----------|-----|
|            | df | SS         | MS        | F         | p-value   | sig |
| Regression | 5  | 15.98459   | 3.196918  | 1.9087678 | 0.1034007 | no  |
| Residual   | 72 | 120.58989  | 1.6748596 |           |           |     |
| Total      | 77 | 136.57448  |           |           |           |     |

|              | coeff     | std err   | t stat    | p-value          | lower     | upper     |
|--------------|-----------|-----------|-----------|------------------|-----------|-----------|
| Intercept    | 1.3641042 | 1.2830054 | 1.06321   | 0.2912397        | -1.19352  | 3.9217288 |
| Gender       | 0.1692558 | 0.3134792 | 0.5399265 | 0.5909138        | -0.455654 | 0.7941652 |
| Age          | 0.0084977 | 0.0200945 | 0.4228839 | 0.6736404        | -0.03156  | 0.0485554 |
| ALT(IU/ml)   | 0.0021851 | 0.0011098 | 1.9689618 | <b>0.0528068</b> | -2.72E-05 | 0.0043975 |
| HBs(Log)     | -0.217254 | 0.2719143 | -0.79898  | 0.4269301        | -0.759305 | 0.3247972 |
| SP/WT DNA (L | -0.167781 | 0.0923704 | -1.816397 | <b>0.073472</b>  | -0.351918 | 0.0163557 |



|       |             |             |   |    |        |             |              |             |   |
|-------|-------------|-------------|---|----|--------|-------------|--------------|-------------|---|
| 34800 | 0.00001     | 500         | 2 | 28 | 284    | 3.698970004 | -5           | 2.698970004 | 2 |
| 3450  | 0.217939567 | 167.3758865 | 2 | 26 | 143    | 3.556302501 | -5           | 2.22369289  | 2 |
| 3900  | 0.009691938 | 3861.003861 | 1 | 29 | 126    | 3.638489257 | -3.041306239 | 3.586700236 | 2 |
| 5000  | 0.00001     | 5102.040816 | 1 | 42 | 471    | 3.462397998 | -2.880556102 | 3.707743929 | 2 |
| 3600  | 0.00001     | 269.541779  | 1 | 25 | 204    | 3.574031268 | -2.612739686 | 2.43062609  | 2 |
| 4350  | 0.000909272 | 591.7159763 | 1 | 36 | 803    | 3.638489257 | -1.711757283 | 2.772113295 | 2 |
| 2900  | 0.00131657  | 437.6146789 | 2 | 55 | 271    | 3.579783597 | -2.604812707 | 2.641091881 | 2 |
| 3750  | 0.002439272 | 1573.604061 | 1 | 33 | 119    | 3.511883361 | -3.208779131 | 3.196895468 | 2 |
| 4350  | 0.019419709 | 3858.757062 | 1 | 25 | 287    | 3.802773725 | -1.906221867 | 3.586447437 | 2 |
| 3800  | 0.002484204 | 4748.538012 | 1 | 49 | 226    | 3.397940009 | -2.904036175 | 3.676559919 | 2 |
| 3250  | 0.000618331 | 5360        | 2 | 29 | 114    | 3.079181246 | -3.453014229 | 3.72916479  | 2 |
| 6350  | 0.012410181 | 1105.568445 | 2 | 31 | 96     | 3.58546073  | -3.925029501 | 3.043585635 | 2 |
| 2500  | 0.00124728  | 2263.975155 | 2 | 38 | 114    | 3.130333768 | -1.857355096 | 3.354871657 | 2 |
| 1200  | 0.000352359 | 22960       | 2 | 20 | 74     | 3.361727836 | -2.16089402  | 4.360971884 | 2 |
| 3850  | 0.000118842 | 981.5668203 | 1 | 33 | 243    | 3.176091259 | -1.678744662 | 2.99191987  | 2 |
| 1350  | 0.013888166 | 4120        | 1 | 32 | 245    | 3.352182518 | -1.552812908 | 3.614897216 | 2 |
| 2300  | 0.006904083 | 286.2254025 | 1 | 31 | 84     | 3.908485019 | -5           | 2.456708175 | 2 |
| 1500  | 0.02095344  | 178.2608696 | 1 | 28 | 436    | 3.079181246 | -5           | 2.251056021 | 2 |
| 2250  | 0.028001874 | 200         | 2 | 26 | 405    | 3.230448921 | -3.845959519 | 2.301029996 | 2 |
| 8100  | 0.00001     | 134.7150259 | 2 | 24 | 167    | 2.903089987 | -5           | 2.129416039 | 2 |
| 1200  | 0.00001     | 1672        | 1 | 26 | 397    | 2.544068044 | -5           | 3.223236273 | 2 |
| 1700  | 0.000142574 | 444         | 2 | 21 | 113    | 3.021189299 | -1.761828087 | 2.64738297  | 2 |
| 800   | 0.00001     | 350.9225092 | 2 | 25 | 100.00 | 3.484299839 | -2.540893326 | 2.545211226 | 2 |
| 350   | 0.00001     | 207.2       | 1 | 31 | 324    | 3.847572659 | -5           | 2.316389751 | 2 |
| 1050  | 0.017305012 | 273.6       | 1 | 25 | 136    | 2.84509804  | -5           | 2.437116093 | 2 |
| 3050  | 0.002878105 | 152.8       | 1 | 46 | 59     | 2.77815125  | -0.245340181 | 2.184123354 | 2 |
| 7040  | 0.00001     |             |   |    |        |             |              |             |   |
| 700   | 0.00001     |             |   |    |        |             |              |             |   |
| 600   | 0.568407525 |             |   |    |        |             |              |             |   |

2: Female \* Fold Reduction of viral DNA after 3 months therapy  
1: Male

We have applied the multiple linear regression models (<http://www.real-statistics.com/multiple-regression/>) to determine whether independent variables including gender, age, ALT, HBsAg (Log), spHBV/wtHBV (Log) are making a significant contribution to the fold of viral DNA reduction after IFN therapy. Results showed that ALT and the ratio of sp/wt HBV tend to be associated with the responses to IFN treatment. The ratio of sp/wt HBV was statistically associated with the responses to IFN treatment when the patients with undetectable spHBV DNAs were excluded.

| Gender | Age | ALT(IU/ml) | HBsAg(Log) | SP/WT DNA (Log) | old Reduction of viral DNA (Log) |
|--------|-----|------------|------------|-----------------|----------------------------------|
| 2      | 28  | 155        | 3.1303338  | -1.409622394    | 1.090610708                      |
| 1      | 21  | 166        | 3.7363965  | -1.553917418    | 1.336007579                      |
| 1      | 32  | 50         | 3.69897    | -1.728413739    | 0.884361286                      |
| 1      | 36  | 95         | 4.3181051  | -1.908680077    | 0.727117892                      |
| 1      | 29  | 145        | 3.9652017  | -1.421664827    | 1.211157884                      |
| 1      | 26  | 80         | 2.845098   | -0.175701502    | 1.97068936                       |
| 2      | 28  | 136        | 3.5502284  | -1.505751708    | 0.886056648                      |
| 1      | 28  | 472        | 3.6283889  | -0.094974468    | 0.765595213                      |
| 2      | 27  | 272        | 3.1903317  | -0.716451328    | 1.206842841                      |
| 2      | 24  | 115        | 3.0211893  | -2.157181059    | 1.641328436                      |
| 2      | 29  | 343        | 3.3521825  | -0.838669357    | -0.921314807                     |
| 1      | 25  | 173        | 3.4393327  | -0.548778242    | -1.121685579                     |
| 2      | 39  | 259        | 3.4065402  | 0.130647597     | 1.62572613                       |
| 2      | 21  | 227        | 3.9777236  | -1.120533777    | 1.239222846                      |
| 2      | 28  | 79         | 3.0791812  | -1.938934772    | 0.735764377                      |
| 1      | 46  | 201        | 4.7252744  | -0.889243324    | 0.409209309                      |
| 2      | 28  | 239        | 2.4771213  | -0.06773129     | 1.818092658                      |
| 1      | 28  | 69         | 2.60206    | -0.252163033    | 0.766729699                      |
| 1      | 22  | 42         | 2.544068   | 0.042144016     | -1.140178703                     |
| 1      | 36  | 61         | 3.1760913  | -0.241726361    | 0.951436073                      |
| 1      | 38  | 145        | 3.748188   | -3.71350616     | 0.787775899                      |
| 1      | 29  | 147        | 4.1673173  | -0.868872759    | 1.643974143                      |
| 1      | 39  | 166        | 3.9800943  | -2.621970987    | 0.954677021                      |
| 1      | 28  | 389        | 4.0472749  | -2.662610105    | 1.315154638                      |
| 1      | 22  | 118        | 4.4601458  | -0.356119229    | 0.66756154                       |
| 1      | 27  | 50         | 3.8027737  | -2.007267791    | 0.642065153                      |
| 1      | 32  | 241        | 4.0334238  | -2.334787654    | 0.910094889                      |
| 1      | 26  | 115        | 4.0934217  | -2.994044286    | 0.549750892                      |
| 1      | 28  | 114        | 4.8590242  | -1.642218892    | 0                                |
| 1      | 26  | 82         | 4.0588055  | -2.99223795     | 0.661543506                      |
| 1      | 24  | 305        | 4.0549959  | -1.79343629     | 2.171340103                      |
| 1      | 40  | 165        | 2.7489629  | -1.442636355    | 2.072411834                      |
| 2      | 32  | 184        | 2.39794    | -3.452613076    | 2.366497075                      |
| 1      | 27  | 169        | 2.39794    | -2.474566454    | 2.265638021                      |
| 2      | 34  | 42         | 2.39794    | -2.461923824    | 2.17293274                       |
| 1      | 39  | 300        | 3.763428   | -2.19089742     | 5.013679697                      |
| 2      | 33  | 387        | 3.1303338  | -3.166484492    | 4.257274869                      |
| 2      | 22  | 121        | 3.30103    | -1.649043083    | 3.654073355                      |
| 1      | 32  | 107        | 3.0849336  | -3.231456325    | 4.910094889                      |
| 1      | 25  | 103        | 3.5378191  | -0.661663917    | 3.634429284                      |
| 1      | 30  | 408        | 3.5910646  | -2.013589393    | 3.490797478                      |
| 1      | 29  | 126        | 3.6384893  | -3.041306239    | 3.586700236                      |
| 1      | 42  | 471        | 3.462398   | -2.880556102    | 3.707743929                      |
| 1      | 25  | 204        | 3.5740313  | -2.612739686    | 2.43062609                       |
| 1      | 36  | 803        | 3.6384893  | -1.711757283    | 2.772113295                      |
| 2      | 55  | 271        | 3.5797836  | -2.604812707    | 2.641091881                      |
| 1      | 33  | 119        | 3.5118834  | -3.208779131    | 3.196895468                      |
| 1      | 25  | 287        | 3.8027737  | -1.906221867    | 3.586447437                      |
| 1      | 49  | 226        | 3.39794    | -2.904036175    | 3.676559919                      |
| 2      | 29  | 114        | 3.0791812  | -3.453014229    | 3.72916479                       |
| 2      | 31  | 96         | 3.5854607  | -3.925029501    | 3.043585635                      |
| 2      | 38  | 114        | 3.1303338  | -1.857355096    | 3.354871657                      |
| 2      | 20  | 74         | 3.3617278  | -2.16089402     | 4.360971884                      |
| 1      | 33  | 243        | 3.1760913  | -1.678744662    | 2.99191987                       |
| 1      | 32  | 245        | 3.3521825  | -1.552812908    | 3.614897216                      |
| 2      | 26  | 405        | 3.2304489  | -3.845959519    | 2.301029996                      |

Regression Analysis

OVERALL FIT

Multiple R 0.5466  
R Square 0.2987  
Adjusted R Square 0.2326  
Standard Error 1.258  
Observations 59

ANOVA

Alpha 0.05

|            | df | SS     | MS     | F      | p-value | sig |
|------------|----|--------|--------|--------|---------|-----|
| Regression | 5  | 35.727 | 7.1454 | 4.5152 | 0.0017  | yes |
| Residual   | 53 | 83.873 | 1.5825 |        |         |     |
| Total      | 58 | 119.6  |        |        |         |     |

Coefficients

|                 | coeff  | std err | t stat | p-value | lower  | upper  |
|-----------------|--------|---------|--------|---------|--------|--------|
| Intercept       | 2.5351 | 1.6067  | 1.5779 | 0.1205  | -0.687 | 5.7577 |
| Gender          | -0.045 | 0.3786  | -0.12  | 0.9049  | -0.805 | 0.7139 |
| Age             | 0.0177 | 0.0234  | 0.7562 | 0.4529  | -0.029 | 0.0646 |
| ALT(IU/ml)      | 0.0019 | 0.0012  | 1.5321 | 0.1315  | -6E-04 | 0.0044 |
| HBsAg(Log)      | -0.714 | 0.3269  | -2.183 | 0.0335  | -1.37  | -0.058 |
| SP/WT DNA (Log) | -0.578 | 0.1567  | -3.689 | 0.0005  | -0.892 | -0.264 |

|   |    |     |           |              |             |
|---|----|-----|-----------|--------------|-------------|
| 2 | 21 | 113 | 3.0211893 | -1.761828087 | 2.64738297  |
| 2 | 25 | 100 | 3.4842998 | -2.540893326 | 2.545211226 |
| 1 | 46 | 59  | 2.7781513 | -0.245340181 | 2.184123354 |

SP/WT HBV DNA>0.00001

**Table S4. Primers for qPCR detection of OAS-1, GAPDH, mMx1, mSTAT1 and mGAPDH**

| <b>Gene</b> | <b>Primer Sequences(5'→3')</b>                           | <b>Length</b> |
|-------------|----------------------------------------------------------|---------------|
| OAS-1       | F- TGCCAGACACGTGTTCCGC<br>R- GAGGAAGACAACCAGGTCAGCG      | 185 bp        |
| GAPDH       | F- GGTATCGTGGAAGGACTCATGA<br>R- ATGCCAGTGAGCTTCCCGTTCAGC | 188 bp        |
| mMx1        | F- GGATGTGATGCGGAACCT<br>R- AGAAGAATGCTGAAGTATGAGTGA     | 156 bp        |
| mSTAT1      | F- CTTCCACGACCTCCTCTC<br>R- CTCCTTCAGACAGTTGTAGATG       | 167 bp        |
| mGAPDH      | F- AGTATGTCGTGGAGTCTA<br>R- CAATCTTGAGTGAGTTGTC          | 162 bp        |

## **References**

1. Naito H, Hayashi S, Abe K. Rapid and specific genotyping system for hepatitis B virus corresponding to six major genotypes by PCR using type-specific primers. *J Clin Microbiol* 2001;39:362-364.
